# Supplementary material for: Deciphering the genetic interactions between Pou4f3, Gfi1, and Rbm24 in maintaining mouse cochlear hair cell survival
Source: eLife. 2024 Mar 14;12:RP90025. doi: 10.7554/eLife.90025 (PMC10939501; doi:10.7554/eLife.90025)
Supplement: Figure 1—figure supplement 2—source data 1. [file elife-90025-fig1-figsupp2-data1.xlsx]

## Sheet: HC numbers and percentages
Figure 1-figure supplement 2D
200um range:
Pou4f3+/+(P1) mice	Replicate-1	Replicate-2	Replicate-3	Replicate-4	average
apical HC	145	130	128	117	130
middle HC	102	126	120	108	114
basal HC	97	100	116	96	102.25
Pou4f3-/-(P0) mice	Replicate-1	Replicate-2	Replicate-3	Replicate-4
apical HC	102	70	77	83
middle HC	53	40	41	40
basal HC	41	23	43	40
Pou4f3-/-(P1) mice	Replicate-1	Replicate-2	Replicate-3
apical HC	81	105	70
middle HC	24	20	10
basal HC	12	2	3
Pou4f3+/+(P1) mice
apical %	1.11538	1	0.984615	0.9
middle %	0.894737	1.10526	1.05263	0.947368
basal %	0.948655	0.977995	1.13447	0.938875
Pou4f3-/-(P0)
apical %	0.784615	0.538462	0.592308	0.638462
middle %	0.464912	0.350877	0.359649	0.350877
basal %	0.400978	0.224939	0.420538	0.391198
Pou4f3-/-(P1)
apical %	0.623077	0.807692	0.538462
middle %	0.210526	0.175439	0.0877193
basal %	0.117359	0.0195599	0.0293399
