# Supplementary figures and images for: Deciphering the genetic interactions between Pou4f3, Gfi1, and Rbm24 in maintaining mouse cochlear hair cell survival
Source: eLife journal article supplement (doi:10.7554/elife.90025), 2023-07-25

Figure 1

B

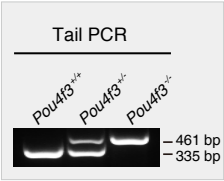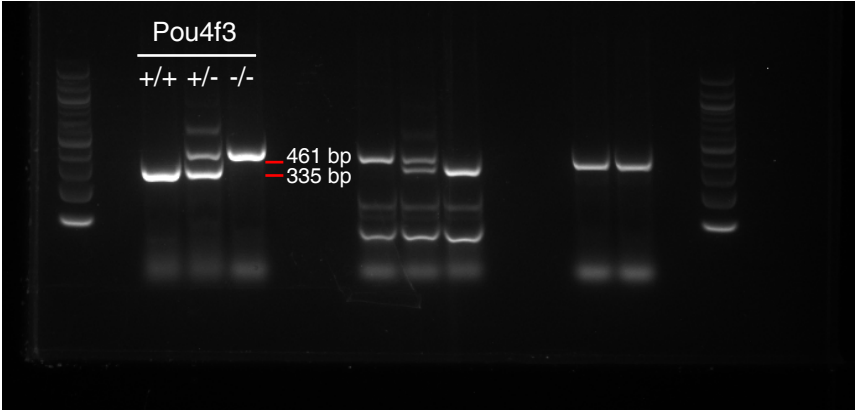

Supplement: fig1-data2 [file elife-90025-fig1-data2-v1.zip]

D

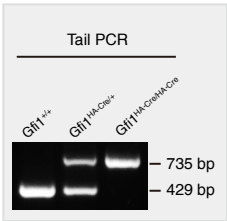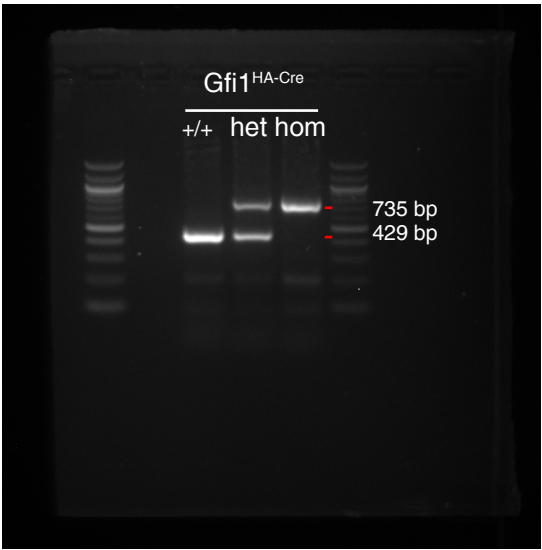

Supplement: fig2-figsupp1-data2 [file elife-90025-fig2-figsupp1-data2-v1.zip]

B

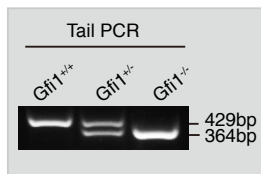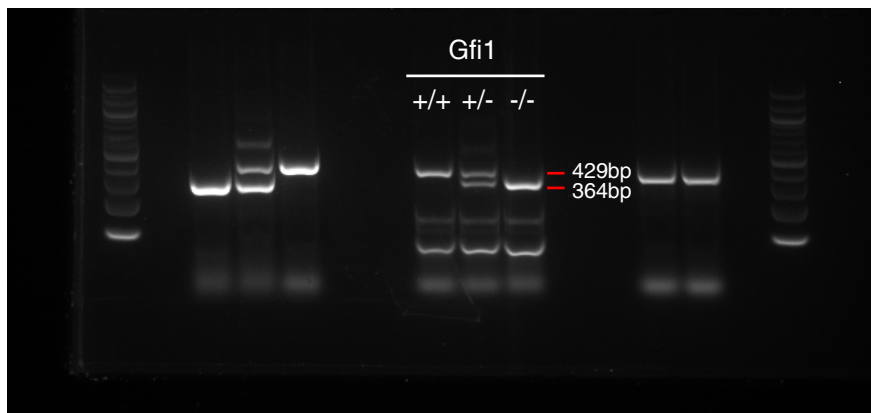

Supplement: fig2-figsupp3-data2 [file elife-90025-fig2-figsupp3-data2-v1.zip]

Figure 5

B

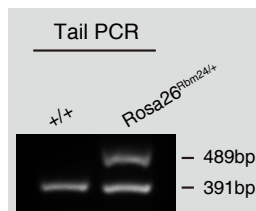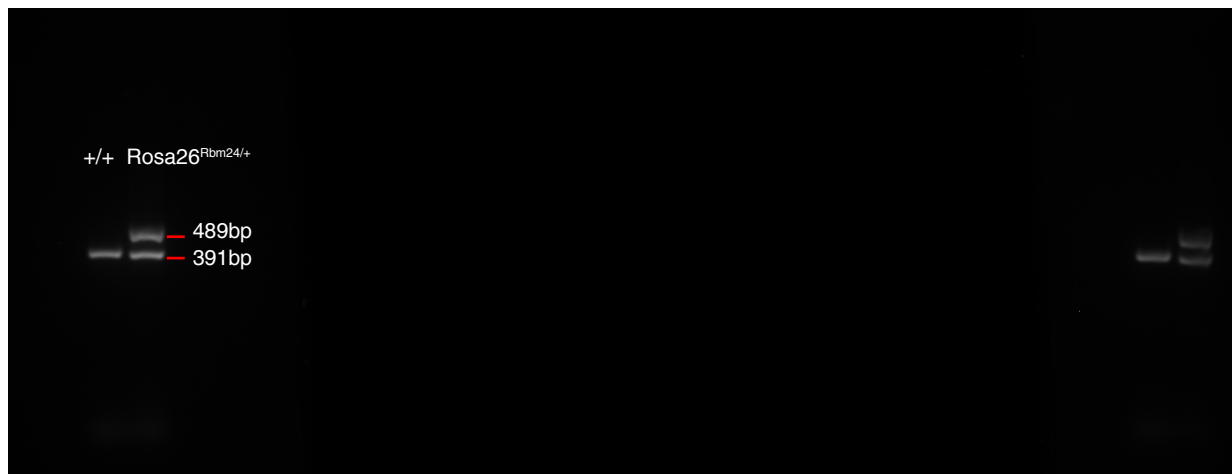

Supplement: fig5-data2 [file elife-90025-fig5-data2-v1.zip]
